# Supplementary material
Source: HighWire-hosted journal article supplement (https://bmjopen.bmj.com/content/12/2/e058416)
Supplement: inline-supplementary-material-3 [file inline-supplementary-material-3.pdf]

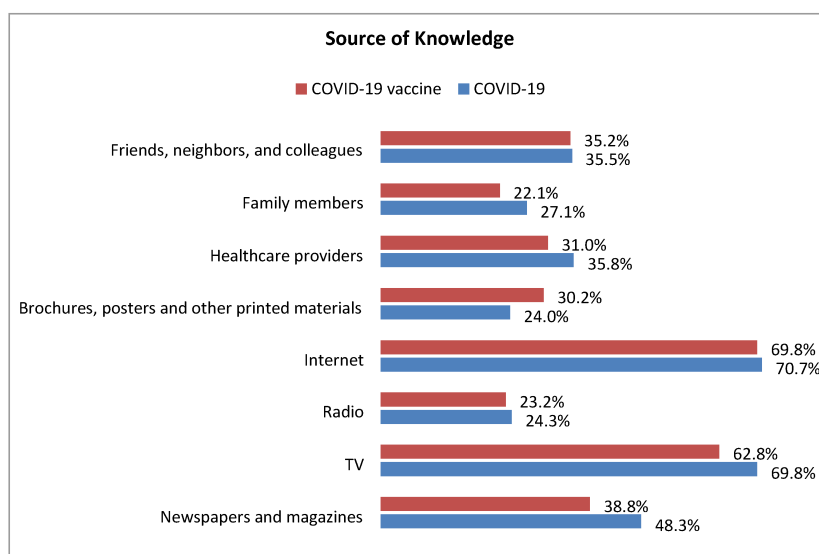

Figure 1 Source of knowledge about COVID-19 and COVID-19 vaccine

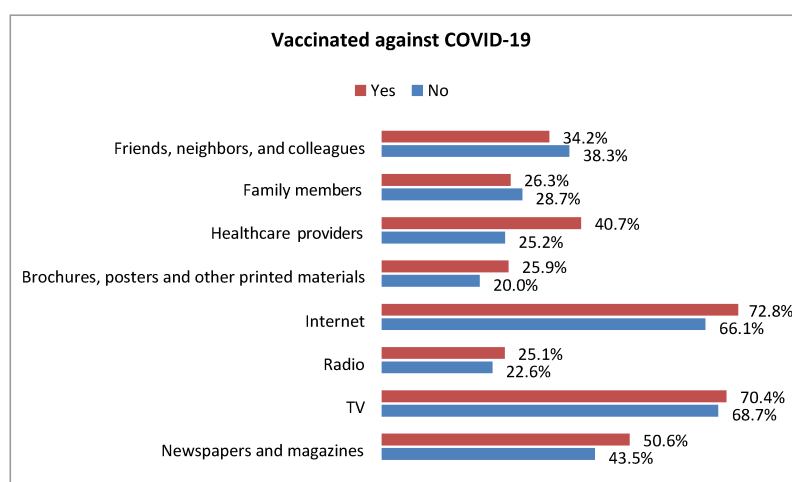

Figure 2 Comparison of information sources on COVID-19 by COVID-19 vaccination

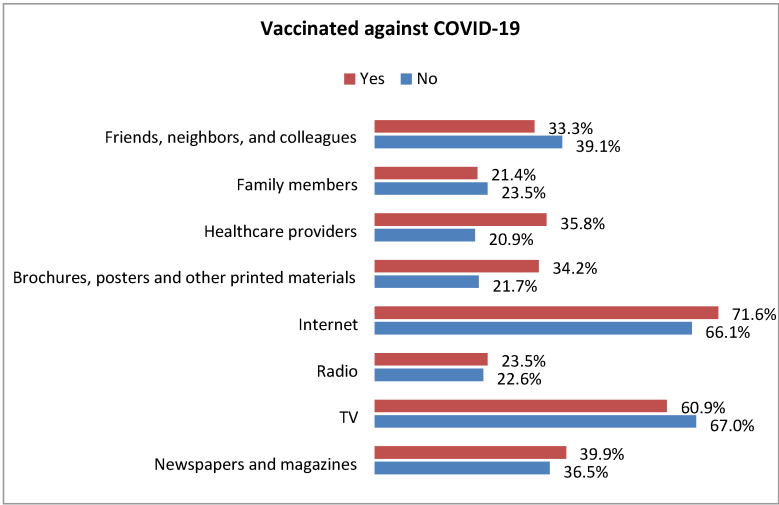

Figure 3 Comparison of information sources on COVID-19 vaccine by COVID-19 vaccination
